# Supplementary material for: HeliDye1: helquat fluorogenic probe specific for AT-rich DNA duplexes
Source: Research Square preprint supplement (doi:10.21203/rs.3.rs-737372/v1), 2022-11-08
Supplement: Supplementary file 1 [file 1644fc35501359d2df8ad011.pdf]

### Video captions

**Video1:** **HeliDye1** blinking inside *S. Aureus* upon background subtraction. A set of 1000 frames is shown in the video; full data contains set of 50 000 frames. Mathematical analysis of the full data set led to super-resolution image reconstruction (Fig. 7 and S18). Time is indicated. For better contrast and visibility, the video was thresholded and zoomed (original size of the video is  $127 \times 127$  pixels).

**Video2:** Dimer of **HeliDye1** (*P*)-enantiomers inside the minor groove of dsDNA (from D1 model). This structure was used as starting conformation for DFT optimisation with subsequent ECD calculation.
